# Supplementary material for: Influence of Adaptive Statistical Iterative Reconstructions on CT Radiomic Features in Oncologic Patients
Source: MDPI journal article supplement (doi:10.3390/diagnostics11061000), 2021-05-31
Supplement: s1 [file s1]

**Table S1.** Mean and Standard Deviation -SD- of CTTA (CT Texture Analysis) of the Liver, Kidney, Spleen and Muscle for each feature (Mean, Entropy, Mean of Positive Pixels -MPP-, Skewness and Kurtosis).

| Mean and Standard Deviation |          |         |         |         |         |         |         |         |         |         |         |          |
|-----------------------------|----------|---------|---------|---------|---------|---------|---------|---------|---------|---------|---------|----------|
|                             | SSF      | FBP     | ASIR 10 | ASIR 20 | ASIR 30 | ASIR 40 | ASIR 50 | ASIR 60 | ASIR 70 | ASIR 80 | ASIR 90 | ASIR 100 |
| LIVER                       | Mean     | 10.24 ± | 10.23 ± | 10.18 ± | 10.17 ± | 10.15 ± | 10.16 ± | 10.21 ± | 10.17 ± | 10.19 ± | 10.13 ± | 10.19 ±  |
|                             |          | 21.68   | 21.66   | 21.68   | 21.67   | 21.67   | 21.64   | 21.62   | 21.63   | 21.59   | 21.60   | 21.59    |
|                             | SD       | 18.47 ± | 17.39 ± | 16.58 ± | 15.75 ± | 14.94 ± | 14.19 ± | 13.60 ± | 12.99 ± | 12.37 ± | 11.78 ± | 11.38 ±  |
|                             |          | 10.91   | 10.04   | 9.43    | 8.86    | 8.37    | 7.91    | 7.58    | 7.24    | 6.92    | 6.67    | 6.58     |
|                             | Entropy  | 3.78 ±  | 3.75 ±  | 3.73 ±  | 3.69 ±  | 3.65 ±  | 3.62 ±  | 3.59 ±  | 3.56 ±  | 3.52 ±  | 3.48 ±  | 3.44 ±   |
|                             |          | 0.44    | 0.42    | 0.42    | 0.41    | 0.41    | 0.40    | 0.39    | 0.39    | 0.39    | 0.40    | 0.41     |
|                             | MPP      | 22.81 ± | 22.18 ± | 21.69 ± | 21.18 ± | 20.71 ± | 20.27 ± | 19.95 ± | 19.54 ± | 19.16 ± | 18.78 ± | 18.57 ±  |
|                             |          | 17.96   | 17.86   | 17.83   | 17.79   | 17.85   | 17.86   | 17.89   | 17.96   | 18.00   | 18.08   | 18.14    |
|                             | Skewness | 0.01 ±  | 0.01 ±  | 0.01 ±  | 0.01 ±  | 0.01 ±  | 0.01 ±  | 0.01 ±  | 0.01 ±  | 0.01 ±  | 0.01 ±  | 0.01 ±   |
|                             |          | 0.45    | 0.45    | 0.45    | 0.46    | 0.47    | 0.47    | 0.47    | 0.48    | 0.49    | 0.49    | 0.49     |
|                             | Kurtosis | -0.35 ± | -0.35 ± | -0.34 ± | -0.34 ± | -0.33 ± | -0.34 ± | -0.34 ± | -0.34 ± | -0.33 ± | -0.34 ± | -0.35 ±  |
|                             |          | 0.61    | 0.63    | 0.66    | 0.63    | 0.65    | 0.65    | 0.64    | 0.65    | 0.66    | 0.66    | 0.66     |
| KIDNEY                      | Mean     | 14.82 ± | 15.05 ± | 15.35 ± | 15.58 ± | 15.77 ± | 16.01 ± | 16.05 ± | 16.17 ± | 16.28 ± | 16.59 ± | 16.52 ±  |
|                             |          | 17.99   | 18.05   | 18.02   | 18.01   | 18.15   | 17.89   | 18.11   | 18.17   | 18.21   | 18.08   | 18.00    |
|                             | SD       | 22.24 ± | 21.13 ± | 20.35 ± | 19.61 ± | 18.92 ± | 18.14 ± | 17.67 ± | 17.12 ± | 16.54 ± | 16.14 ± | 15.51 ±  |
|                             |          | 13.44   | 12.94   | 12.60   | 12.33   | 12.17   | 11.64   | 11.94   | 11.91   | 11.90   | 11.98   | 11.52    |
|                             | Entropy  | 3.78 ±  | 3.76 ±  | 3.73 ±  | 3.71 ±  | 3.69 ±  | 3.67 ±  | 3.65 ±  | 3.62 ±  | 3.59 ±  | 3.56 ±  | 3.53 ±   |
|                             |          | 0.36    | 0.35    | 0.34    | 0.34    | 0.34    | 0.33    | 0.34    | 0.35    | 0.36    | 0.38    | 0.40     |
|                             | MPP      | 26.74 ± | 26.22 ± | 25.93 ± | 25.61 ± | 25.37 ± | 25.07 ± | 24.82 ± | 24.59 ± | 24.33 ± | 24.31 ± | 23.92 ±  |
|                             |          | 11.13   | 11.12   | 10.89   | 10.85   | 10.99   | 11.08   | 11.16   | 11.30   | 11.52   | 11.62   | 11.84    |
|                             | Skewness | -0.03 ± | -0.02 ± | -0.02 ± | -0.02 ± | -0.02 ± | -0.01 ± | -0.02 ± | -0.02 ± | -0.02 ± | -0.02 ± | 0.00 ±   |
|                             |          | 0.56    | 0.56    | 0.57    | 0.57    | 0.57    | 0.57    | 0.57    | 0.58    | 0.59    | 0.59    | 0.60     |
|                             | Kurtosis | -0.26 ± | -0.26 ± | -0.25 ± | -0.25 ± | -0.25 ± | -0.24 ± | -0.25 ± | -0.24 ± | -0.23 ± | -0.24 ± | -0.23 ±  |
|                             |          | 0.96    | 0.99    | 1.00    | 1.02    | 1.04    | 1.05    | 1.05    | 1.06    | 1.09    | 1.08    | 1.09     |
| SPLEEN                      | Mean     | 11.53 ± | 11.29 ± | 11.31 ± | 11.32 ± | 11.33 ± | 11.30 ± | 11.30 ± | 11.34 ± | 11.40 ± | 11.44 ± | 11.34 ±  |
|                             |          | 21.86   | 21.91   | 21.88   | 21.86   | 21.82   | 21.82   | 21.82   | 21.79   | 21.77   | 21.74   | 21.85    |
|                             | SD       | 18.39 ± | 17.28 ± | 16.49 ± | 15.75 ± | 15.00 ± | 14.23 ± | 13.74 ± | 13.08 ± | 12.48 ± | 11.94 ± | 11.54 ±  |
|                             |          | 11.08   | 10.13   | 9.56    | 9.06    | 8.65    | 8.14    | 7.91    | 7.61    | 7.37    | 7.18    | 7.16     |
|                             | Entropy  | 3.69 ±  | 3.67 ±  | 3.64 ±  | 3.62 ±  | 3.58 ±  | 3.55 ±  | 3.53 ±  | 3.49 ±  | 3.45 ±  | 3.42 ±  | 3.38 ±   |
|                             |          | 0.44    | 0.42    | 0.42    | 0.41    | 0.41    | 0.40    | 0.40    | 0.40    | 0.41    | 0.41    | 0.42     |
|                             | MPP      | 23.15 ± | 22.38 ± | 21.92 ± | 21.50 ± | 21.08 ± | 20.62 ± | 20.31 ± | 19.97 ± | 19.62 ± | 19.32 ± | 19.02 ±  |
|                             |          | 16.85   | 16.73   | 16.70   | 16.67   | 16.70   | 16.73   | 16.79   | 16.85   | 16.95   | 17.01   | 17.12    |
|                             | Skewness | -0.05 ± | -0.05 ± | -0.05 ± | -0.05 ± | -0.05 ± | -0.04 ± | -0.04 ± | -0.05 ± | -0.04 ± | -0.05 ± | -0.06 ±  |
|                             |          | 0.53    | 0.54    | 0.55    | 0.55    | 0.55    | 0.55    | 0.56    | 0.56    | 0.57    | 0.57    | 0.58     |
|                             | Kurtosis | -0.21 ± | -0.21 ± | -0.21 ± | -0.21 ± | -0.21 ± | -0.20 ± | -0.20 ± | -0.19 ± | -0.18 ± | -0.18 ± | -0.20 ±  |
|                             |          | 0.83    | 0.83    | 0.85    | 0.84    | 0.84    | 0.85    | 0.86    | 0.88    | 0.89    | 0.89    | 0.89     |
| MUSCLE                      | Mean     | 21.50 ± | 21.81 ± | 21.87 ± | 22.04 ± | 22.14 ± | 22.29 ± | 22.33 ± | 22.41 ± | 22.41 ± | 22.29 ± | 22.30 ±  |
|                             |          | 23.79   | 23.95   | 23.95   | 23.99   | 24.13   | 24.15   | 24.26   | 24.13   | 24.32   | 24.25   | 24.27    |
|                             | SD       | 24.21 ± | 23.32 ± | 22.74 ± | 21.82 ± | 21.11 ± | 20.38 ± | 19.75 ± | 19.09 ± | 18.57 ± | 17.97 ± | 17.49 ±  |
|                             |          | 13.38   | 12.88   | 12.80   | 12.43   | 12.26   | 12.09   | 11.98   | 11.65   | 11.87   | 11.85   | 11.86    |
|                             | Entropy  | 3.90 ±  | 3.88 ±  | 3.86 ±  | 3.84 ±  | 3.81 ±  | 3.79 ±  | 3.77 ±  | 3.74 ±  | 3.71 ±  | 3.68 ±  | 3.65 ±   |
|                             |          | 0.38    | 0.38    | 0.38    | 0.38    | 0.37    | 0.38    | 0.38    | 0.39    | 0.40    | 0.42    | 0.43     |
|                             | MPP      | 33.52 ± | 33.22 ± | 32.99 ± | 32.54 ± | 32.24 ± | 31.92 ± | 31.60 ± | 31.28 ± | 30.98 ± | 30.55 ± | 30.24 ±  |
|                             |          | 16.26   | 16.36   | 16.54   | 16.73   | 17.01   | 17.20   | 17.49   | 17.69   | 17.89   | 18.01   | 18.11    |
|                             | Skewness | -0.15 ± | -0.14 ± | -0.15 ± | -0.15 ± | -0.14 ± | -0.14 ± | -0.14 ± | -0.14 ± | -0.14 ± | -0.13 ± | -0.14 ±  |
|                             |          | 0.51    | 0.52    | 0.52    | 0.52    | 0.53    | 0.54    | 0.54    | 0.54    | 0.55    | 0.56    | 0.56     |
|                             | Kurtosis | -0.25 ± | -0.25 ± | -0.24 ± | -0.25 ± | -0.23 ± | -0.23 ± | -0.23 ± | -0.23 ± | -0.23 ± | -0.22 ± | -0.23 ±  |
|                             |          | 0.82    | 0.83    | 0.85    | 0.87    | 0.90    | 0.90    | 0.90    | 0.92    | 0.92    | 0.94    | 0.94     |
